# Supplementary material for: In vitro simulated digestion and fermentation behaviors of polysaccharides from Pleurotus cornucopiae and their impact on the gut microbiota
Source: Royal Society of Chemistry journal article supplement (doi:10.1039/d4fo02873b), 2024-01-01
Supplement: d4fo02873b1.pdf [file d4fo02873b1.pdf]

1

## Supplementary Materials

2 **Fig. S1** The analysis of  $^1\text{H}$  NMR for PCPs (A) and MPCPs (B)

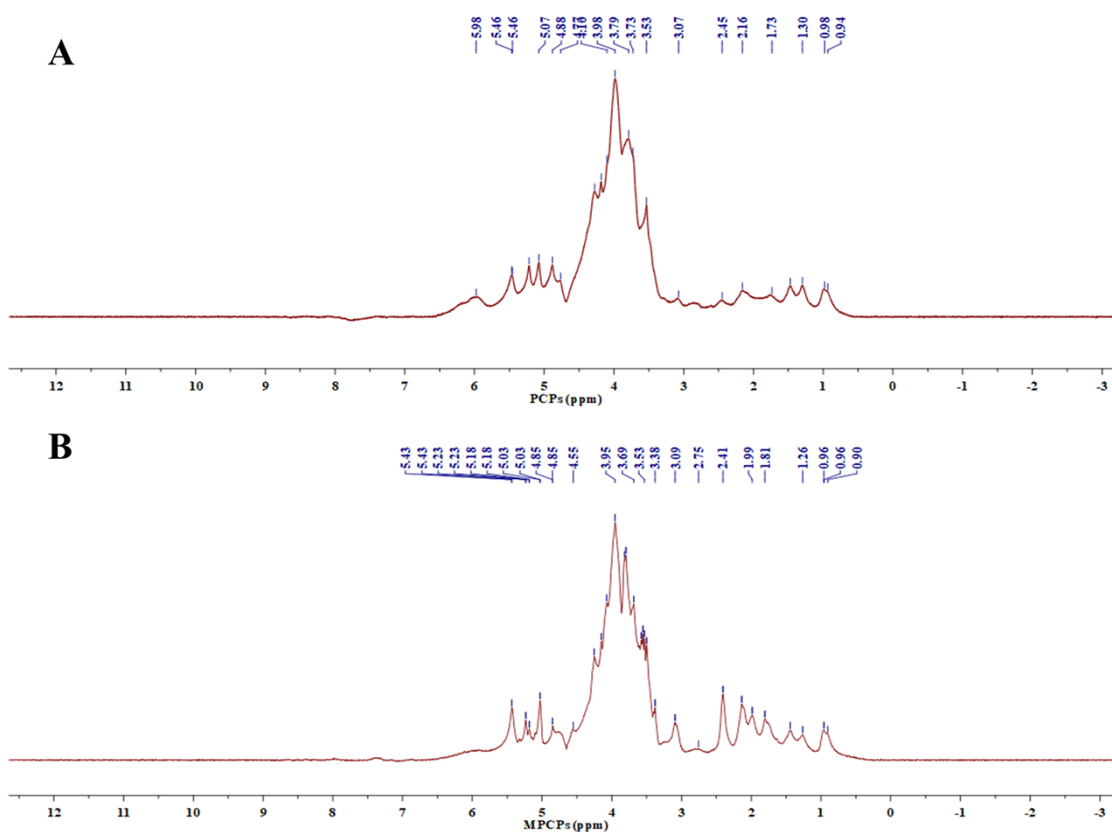

4 **Fig. S2** The standard curve for the antioxidant activities of the positive control (A)  
5 Vitamin C (Vc) standard curve; (B) 2,6-di-*tert*-butyl-4- methylphenol (BHT) standard  
6 curve; (C) Ethylenediamine tetraacetic acid (EDTA) standard curve

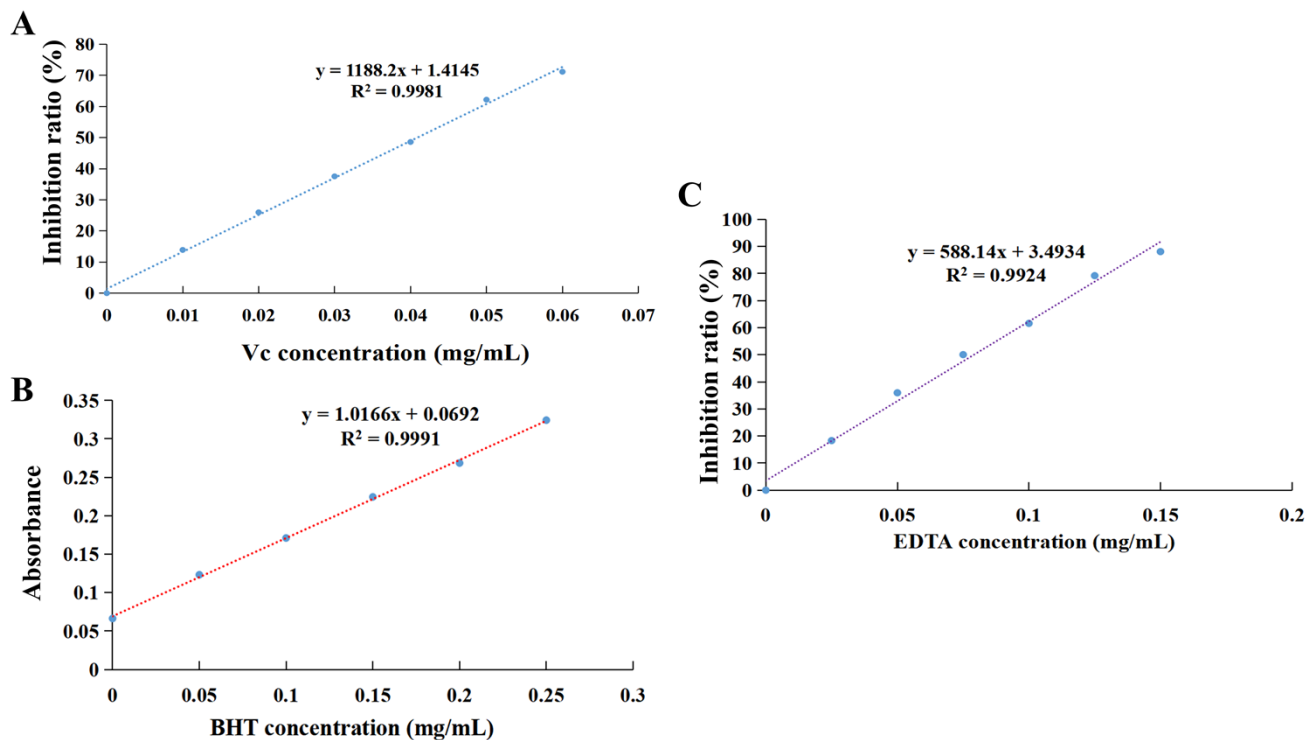

7 VC, BHT and EDTA were positive controls for DPPH free radical activity, reducing  
8 power and metal chelating power, respectively.

9 **Table S1**

10 Changes in molecular weight ( $M_w$ ) of PCPs and MPCPs during *in vitro* digestion

| Samples | Stage      | Peak1<br>$M_w$ (Da) | $M_w/M_n$ | Areas<br>(%) | Peak2<br>$M_w$ (Da) | $M_w/M_n$ | Areas<br>(%) | Peak3<br>$M_w$ (Da) | $M_w/M_n$ | Areas<br>(%) | Peak4<br>$M_w$ (Da) | $M_w/M_n$ | Areas<br>(%) |
|---------|------------|---------------------|-----------|--------------|---------------------|-----------|--------------|---------------------|-----------|--------------|---------------------|-----------|--------------|
| PCPs    | undigested | $3.619 \times 10^6$ | 20.620    | 2.9          | $1.375 \times 10^6$ | 1.734     | 37.5         | $7.482 \times 10^5$ | 1.479     | 27.1         | $4.358 \times 10^5$ | 1.221     | 32.5         |
|         | PCPs-S     | $4.163 \times 10^6$ | 3.100     | 2.6          | $1.404 \times 10^6$ | 1.349     | 42.8         | $9.481 \times 10^5$ | 1.077     | 54.6         | ND                  |           |              |
|         | PCPs-G     | $3.363 \times 10^6$ | 1.005     | 3.5          | $1.294 \times 10^6$ | 1.151     | 41.1         | $1.131 \times 10^6$ | 1.065     | 55.4         | ND                  |           |              |
|         | PCPs-I     | $3.627 \times 10^6$ | 1.008     | 3.2          | $1.356 \times 10^6$ | 1.165     | 43.5         | $1.393 \times 10^6$ | 1.054     | 53.3         | ND                  |           |              |
| MPCPs   | undigested | $2.572 \times 10^6$ | 17.199    | 5.4          | $1.131 \times 10^6$ | 1.046     | 47.1         | $4.159 \times 10^5$ | 1.248     | 47.5         | ND                  |           |              |
|         | MPCPs-S    | $2.104 \times 10^6$ | 17.413    | 1.4          | $1.020 \times 10^6$ | 1.679     | 50.0         | $3.998 \times 10^5$ | 1.033     | 48.6         | ND                  |           |              |
|         | MPCPs-G    | $1.847 \times 10^6$ | 6.062     | 1.7          | $9.140 \times 10^5$ | 1.523     | 56.0         | $4.060 \times 10^5$ | 1.036     | 42.3         | ND                  |           |              |
|         | MPCPs-I    | $1.645 \times 10^6$ | 10.524    | 1.1          | $1.100 \times 10^6$ | 1.558     | 58.1         | $5.010 \times 10^5$ | 1.031     | 40.8         | ND                  |           |              |

11 Undigested, PCPs-S, PCPs-G and PCPs-I in PCPs represent undigested PCPs, saliva-digested, gastric-digested, and intestinal-digested PCPs,  
 12 respectively. Undigested, MPCPs-S, MPCPs-G and MPCPs-I in MPCPs represent undigested MPCPs, saliva-digested, gastric-digested, and  
 13 intestinal-digested MPCPs, respectively. ND: not detected.

14 **Table S2**

15 Monosaccharide composition of PCPs and MPCPs during *in vitro* stimulated digestion (%)

| Samples | Stage      | Man                      | Rib                    | Rha                    | GlcA                   | GalA                   | Glu                      | Gal                     | Xyl                    | Ara                    | Fuc                     |
|---------|------------|--------------------------|------------------------|------------------------|------------------------|------------------------|--------------------------|-------------------------|------------------------|------------------------|-------------------------|
| PCPs    | undigested | 14.41±1.52 <sup>c</sup>  | 3.94±0.98 <sup>b</sup> | 0.33±0.05 <sup>d</sup> | 0.08±0.08 <sup>b</sup> | 0.03±0.03 <sup>b</sup> | 55.28±2.20 <sup>a</sup>  | 22.97±0.92 <sup>d</sup> | 0.04±0.00 <sup>a</sup> | 2.49±0.36 <sup>c</sup> | 0.43±0.21 <sup>c</sup>  |
|         | PCPs-S     | 23.57±0.06 <sup>a</sup>  | 1.57±0.22 <sup>c</sup> | 0.44±0.04 <sup>c</sup> | 0.49±0.29 <sup>a</sup> | 0.17±0.01 <sup>a</sup> | 34.84±0.27 <sup>b</sup>  | 33.27±0.23 <sup>b</sup> | 0.46±0.01 <sup>c</sup> | 4.44±0.01 <sup>b</sup> | 0.76±0.08 <sup>b</sup>  |
|         | PCPs-G     | 21.85±0.27 <sup>b</sup>  | 1.14±0.09 <sup>c</sup> | 0.71±0.03 <sup>b</sup> | 0.65±0.08 <sup>a</sup> | 0.19±0.04 <sup>a</sup> | 35.25±2.71 <sup>b</sup>  | 35.45±0.07 <sup>a</sup> | 0.55±0.02 <sup>a</sup> | 3.55±0.41 <sup>b</sup> | 0.65±0.17 <sup>bc</sup> |
|         | PCPs-I     | 21.98±0.38 <sup>b</sup>  | 5.77±0.99 <sup>a</sup> | 1.06±0.08 <sup>a</sup> | 0.65±0.02 <sup>a</sup> | 0.17±0.08 <sup>a</sup> | 35.66±0.51 <sup>b</sup>  | 30.12±0.44 <sup>c</sup> | 0.51±0.03 <sup>b</sup> | 2.84±0.00 <sup>c</sup> | 1.23±0.06 <sup>a</sup>  |
| MPCPs   | undigested | 9.80±0.16 <sup>c</sup>   | 1.56±0.04 <sup>c</sup> | 0.40±0.04 <sup>c</sup> | 0.08±0.00 <sup>a</sup> | 0.06±0.01 <sup>a</sup> | 78.16±0.34 <sup>a</sup>  | 8.24±0.19 <sup>b</sup>  | 0.04±0.01 <sup>b</sup> | 1.37±0.04 <sup>c</sup> | 0.30±0.05 <sup>c</sup>  |
|         | MPCPs-S    | 14.29±0.19 <sup>a</sup>  | 4.13±0.01 <sup>b</sup> | 0.64±0.04 <sup>b</sup> | 0.07±0.04 <sup>a</sup> | 0.23±0.20 <sup>a</sup> | 61.72±2.26 <sup>bc</sup> | 15.61±1.81 <sup>a</sup> | 0.61±0.14 <sup>a</sup> | 2.22±0.18 <sup>a</sup> | 0.48±0.15 <sup>b</sup>  |
|         | MPCPs-G    | 13.63±1.16 <sup>ab</sup> | 4.02±0.16 <sup>b</sup> | 0.84±0.05 <sup>a</sup> | 0.04±0.05 <sup>a</sup> | 0.33±0.00 <sup>a</sup> | 63.16±1.17 <sup>b</sup>  | 14.93±0.09 <sup>a</sup> | 0.57±0.07 <sup>a</sup> | 1.87±0.10 <sup>b</sup> | 0.60±0.09 <sup>b</sup>  |
|         | MPCPs-I    | 12.60±0.70 <sup>b</sup>  | 7.33±0.29 <sup>a</sup> | 0.88±0.05 <sup>a</sup> | 0.09±0.03 <sup>a</sup> | 0.55±0.44 <sup>a</sup> | 59.30±1.70 <sup>c</sup>  | 16.25±1.21 <sup>a</sup> | 0.59±0.02 <sup>a</sup> | 1.37±0.10 <sup>c</sup> | 1.04±0.11 <sup>a</sup>  |

16 Each value is expressed as the mean ± SD (n = 3) of triplicate determinations. Means with different letters within a row are significantly  
17 different ( $p < 0.05$ ). Man: Mannose; Rib: Ribose; Rha: Rhamnose; GlcA: Glucuronic Acid; GalA: Galacturonic Acid; Glu: Glucose; Gal:  
18 Galactose; Xyl: Xylose; Ara: Arabinose; Fuc: Fucose. Undigested, PCPs-S, PCPs-G and PCPs-I in PCPs represent undigested PCPs, saliva-  
19 digested, gastric-digested, and intestinal-digested PCPs, respectively. Undigested, MPCPs-S, MPCPs-G and MPCPs-I in MPCPs represent  
20 undigested MPCPs, saliva-digested, gastric-digested, and intestinal-digested MPCPs, respectively.

21 **Table S3**

22 Basic sequencing indexes and Alpha diversity of samples from different groups

| Sample | Sobs                       | Ace                       | Chao                      | Coverage    | Shannon                | Simpson                |
|--------|----------------------------|---------------------------|---------------------------|-------------|------------------------|------------------------|
| OR     | 243.33±1.15 <sup>a</sup>   | 267.65±2.01 <sup>a</sup>  | 277.00±12.19 <sup>a</sup> | 0.999419667 | 3.78±0.00 <sup>a</sup> | 0.05±0.05 <sup>c</sup> |
| BLK    | 212.67±1.53 <sup>b</sup>   | 242.39±2.19 <sup>b</sup>  | 253.28±11.29 <sup>a</sup> | 0.999229667 | 3.15±0.44 <sup>b</sup> | 0.09±0.01 <sup>b</sup> |
| INL    | 141.33±4.16 <sup>d</sup>   | 185.89±18.50 <sup>c</sup> | 168.68±8.99 <sup>c</sup>  | 0.999225333 | 2.31±0.05 <sup>d</sup> | 0.20±0.01 <sup>a</sup> |
| PCPs   | 158.67±9.02 <sup>c</sup>   | 187.33±5.28 <sup>c</sup>  | 181.91±6.12 <sup>bc</sup> | 0.999086333 | 2.73±0.12 <sup>c</sup> | 0.11±0.01 <sup>b</sup> |
| MPCPs  | 156.33±19.50 <sup>cd</sup> | 194.81±26.03 <sup>c</sup> | 204.32±33.67 <sup>b</sup> | 0.998914667 | 2.68±0.23 <sup>c</sup> | 0.11±0.02 <sup>b</sup> |

23 Each value is expressed as the mean ± SD (n = 3) of triplicate determinations. Means with different letters within a row are significantly  
 24 different ( $p < 0.05$ ).

25 **Table S4**

26 The concentration of short chain fatty (SCFAs) during fermentation (mM)

| Groups | Time | Acetic acid             | Propionic acid          | <i>i</i> -Butyric acid  | <i>n</i> -Butyric acid  | <i>i</i> -Valeric acid | <i>n</i> -Valeric acid | Total                   |
|--------|------|-------------------------|-------------------------|-------------------------|-------------------------|------------------------|------------------------|-------------------------|
| BLK    | 0    | 0.41±0.02 <sup>c</sup>  | ND                      | ND                      | ND                      | ND                     | 0.14±0.00 <sup>c</sup> | 0.54±0.02 <sup>d</sup>  |
|        | 6    | 0.70±0.18 <sup>b</sup>  | 0.34±0.15 <sup>b</sup>  | 0.14±0.01 <sup>bc</sup> | 0.17±0.01 <sup>b</sup>  | ND                     | ND                     | 1.36±0.06 <sup>c</sup>  |
|        | 12   | 0.69±0.12 <sup>b</sup>  | 0.52±0.03 <sup>a</sup>  | 0.23±0.05 <sup>b</sup>  | 0.17±0.01 <sup>b</sup>  | 0.08±0.00 <sup>a</sup> | 0.19±0.00 <sup>b</sup> | 1.89±0.10 <sup>b</sup>  |
|        | 24   | 1.17±0.09 <sup>a</sup>  | 0.47±0.06 <sup>ab</sup> | 0.54±0.21 <sup>a</sup>  | 0.34±0.07 <sup>a</sup>  | 0.11±0.03 <sup>a</sup> | 0.85±0.05 <sup>a</sup> | 3.47±0.37 <sup>a</sup>  |
| INL    | 0    | 1.67±0.23 <sup>d</sup>  | ND                      | ND                      | ND                      | ND                     | ND                     | 1.67±0.23 <sup>d</sup>  |
|        | 6    | 3.05±0.21 <sup>c</sup>  | 1.16±0.04 <sup>c</sup>  | 0.86±0.08 <sup>c</sup>  | 2.51±0.11 <sup>c</sup>  | 0.53±0.02 <sup>b</sup> | 0.42±0.11 <sup>c</sup> | 8.54±0.35 <sup>c</sup>  |
|        | 12   | 6.37±0.71 <sup>b</sup>  | 2.37±0.12 <sup>b</sup>  | 1.08±0.11 <sup>b</sup>  | 3.27±0.23 <sup>b</sup>  | 0.78±0.04 <sup>b</sup> | 1.39±0.05 <sup>b</sup> | 15.27±0.66 <sup>b</sup> |
|        | 24   | 10.73±0.66 <sup>a</sup> | 3.94±0.14 <sup>a</sup>  | 1.79±0.14 <sup>a</sup>  | 3.88±0.14 <sup>a</sup>  | 1.60±0.35 <sup>a</sup> | 2.47±0.28 <sup>a</sup> | 24.41±1.29 <sup>a</sup> |
| PCPs   | 0    | 1.00±0.03 <sup>d</sup>  | ND                      | ND                      | ND                      | ND                     | 0.25±0.02 <sup>d</sup> | 1.24±0.47 <sup>d</sup>  |
|        | 6    | 1.67±0.08 <sup>c</sup>  | 0.43±0.23 <sup>c</sup>  | 0.55±0.10 <sup>b</sup>  | 1.92±0.03 <sup>b</sup>  | 0.33±0.07 <sup>c</sup> | 0.39±0.03 <sup>c</sup> | 5.30±0.21 <sup>c</sup>  |
|        | 12   | 4.68±0.46 <sup>b</sup>  | 1.70±0.09 <sup>b</sup>  | 0.53±0.04 <sup>b</sup>  | 2.26±0.58 <sup>ab</sup> | 0.54±0.11 <sup>b</sup> | 0.89±0.06 <sup>b</sup> | 10.61±0.45 <sup>b</sup> |
|        | 24   | 7.20±0.34 <sup>a</sup>  | 3.26±0.21 <sup>a</sup>  | 1.32±0.38 <sup>a</sup>  | 2.52±0.20 <sup>a</sup>  | 0.87±0.01 <sup>a</sup> | 2.02±0.12 <sup>a</sup> | 17.20±0.34 <sup>a</sup> |
| MPCPs  | 0    | 1.06±0.04 <sup>d</sup>  | ND                      | ND                      | ND                      | ND                     | 0.20±0.03 <sup>d</sup> | 1.26±0.05 <sup>d</sup>  |
|        | 6    | 1.50±0.05 <sup>c</sup>  | 0.47±0.03 <sup>c</sup>  | 0.55±0.06 <sup>c</sup>  | 1.49±0.07 <sup>c</sup>  | 0.55±0.21 <sup>b</sup> | 0.45±0.06 <sup>c</sup> | 5.01±0.29 <sup>c</sup>  |
|        | 12   | 4.20±0.41 <sup>b</sup>  | 1.42±0.07 <sup>b</sup>  | 1.09±0.07 <sup>a</sup>  | 1.86±0.12 <sup>b</sup>  | 0.71±0.05 <sup>b</sup> | 0.84±0.07 <sup>b</sup> | 10.12±0.55 <sup>b</sup> |
|        | 24   | 6.80±0.10 <sup>a</sup>  | 4.84±0.56 <sup>a</sup>  | 1.30±0.27 <sup>a</sup>  | 2.15±0.13 <sup>a</sup>  | 0.92±0.02 <sup>a</sup> | 2.16±0.01 <sup>a</sup> | 18.18±0.50 <sup>a</sup> |

27 Each value is expressed as the mean ± SD (n = 3) of triplicate determinations. Means with different letters within a row are significantly  
 28 different ( $p < 0.05$ ).
